# Supplementary figures and images for: Daratumumab monotherapy in refractory warm autoimmune hemolytic anemia and cold agglutinin disease
Source: PubMed Central journal article supplement — Blood Adv. 2024 Mar 22;8(11):2622–34. doi: 10.1182/bloodadvances.2024012585 (PMC11157213; doi:10.1182/bloodadvances.2024012585), 2024-03-22

# Suppl. Figure 1.

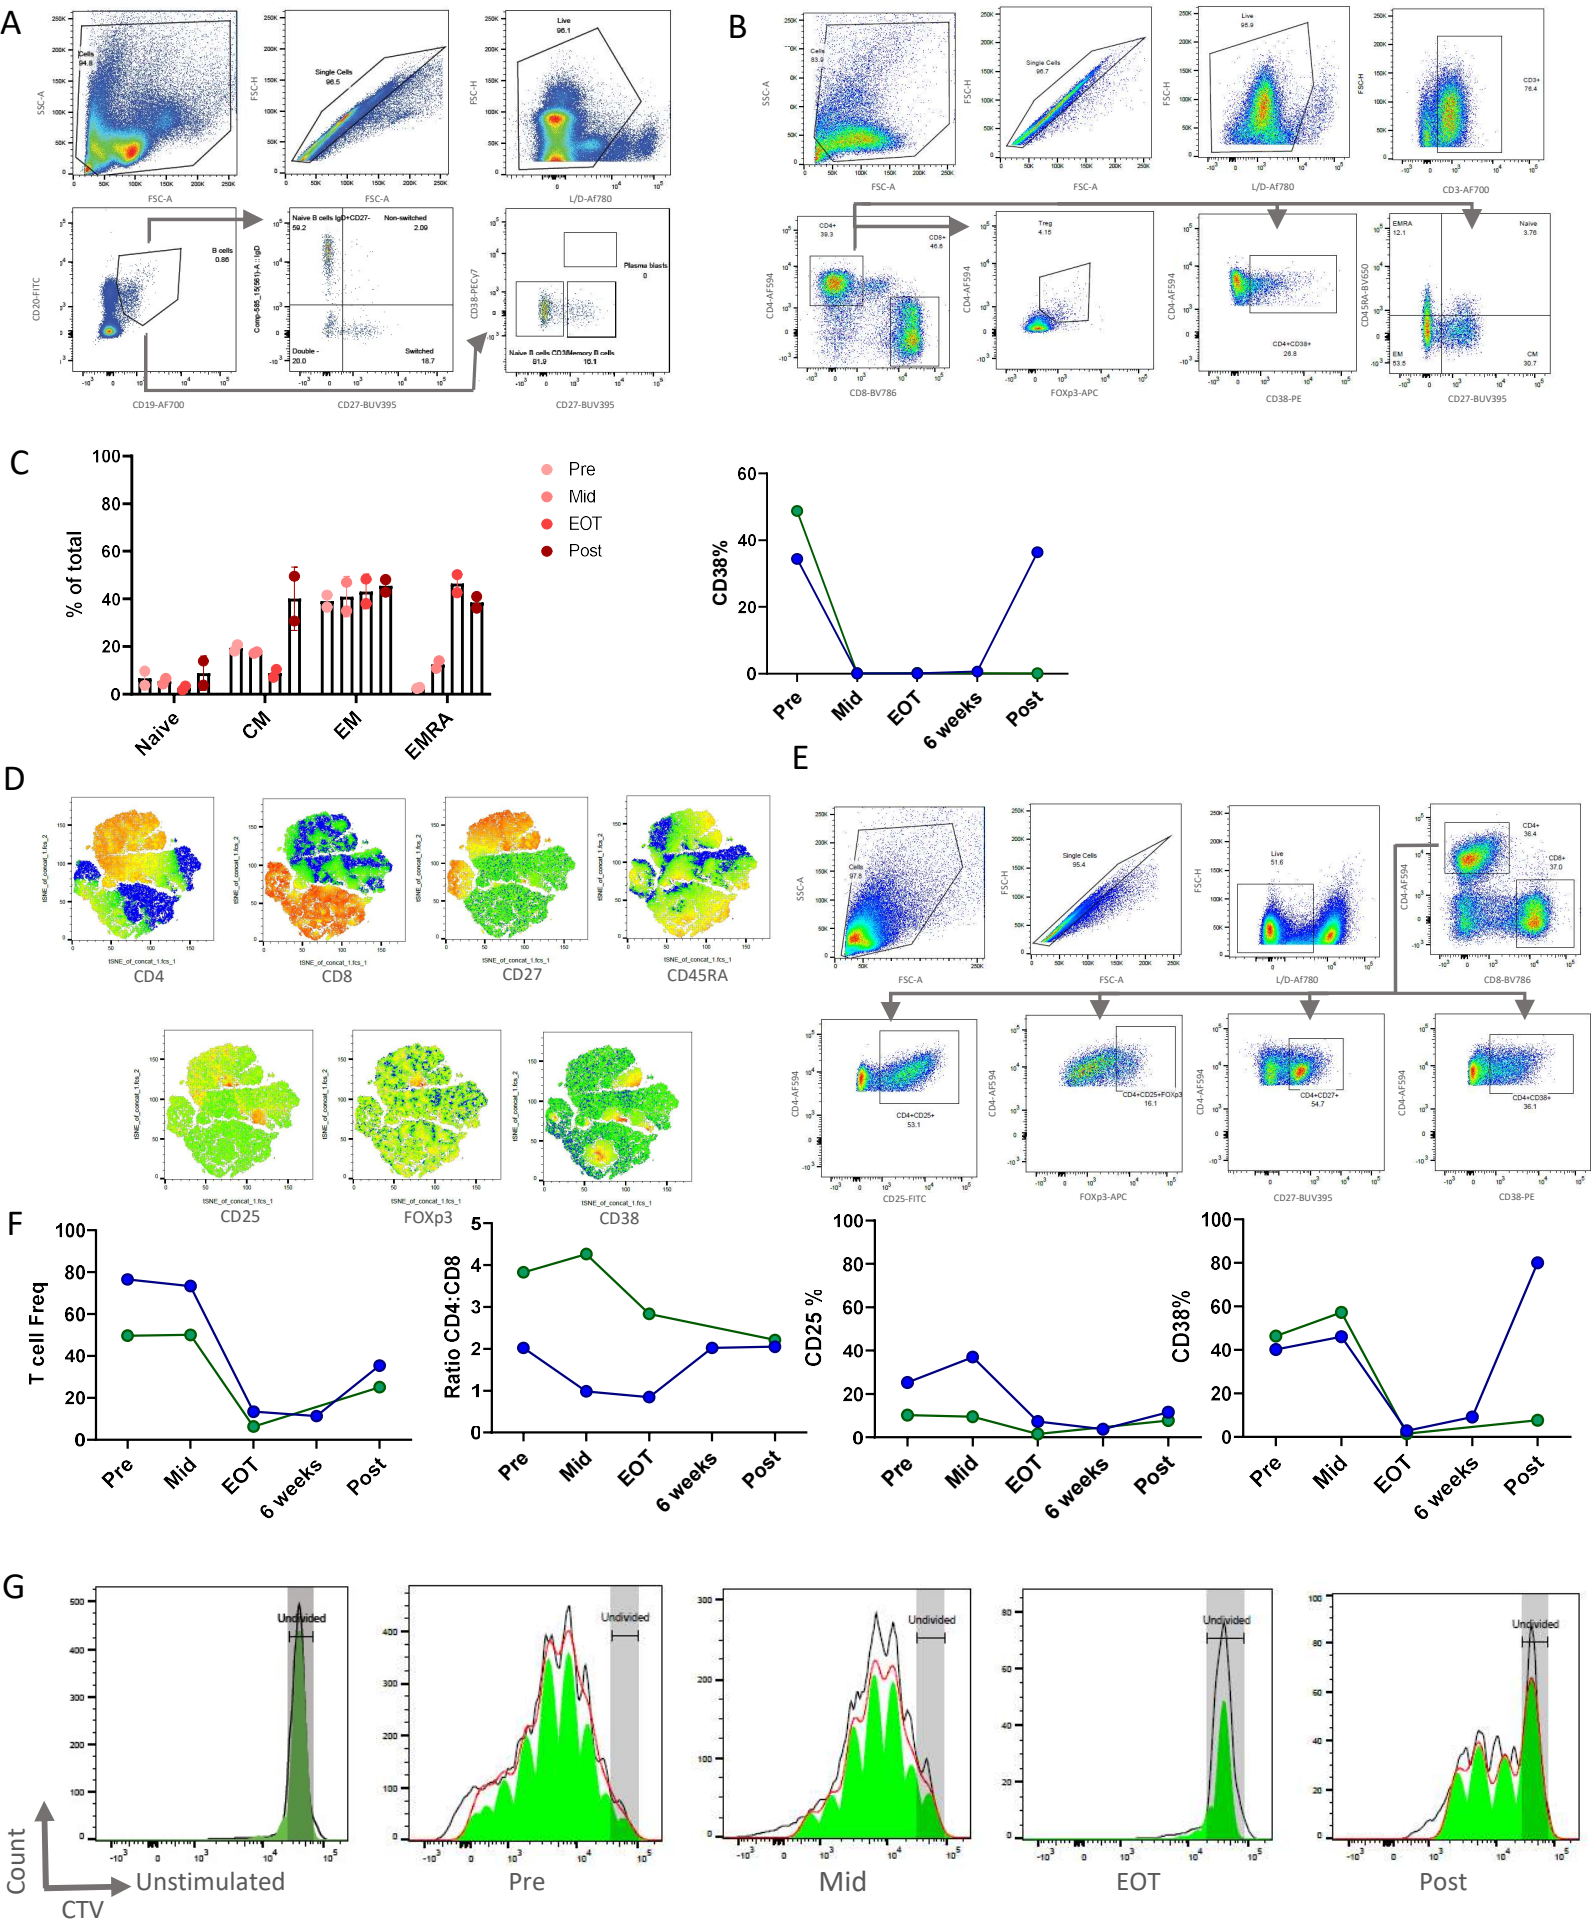

Supplement: BLOODA_ADV-2024-012585-mmc1.pdf [file BLOODA_ADV-2024-012585-mmc1.pdf]
